# Supplementary material
Source: Springer Nature journal article supplement (https://www.springermedizin.de/resource/supplementary/13041_2013_221_MOESM14_ESM.pdf/25657772)

**A**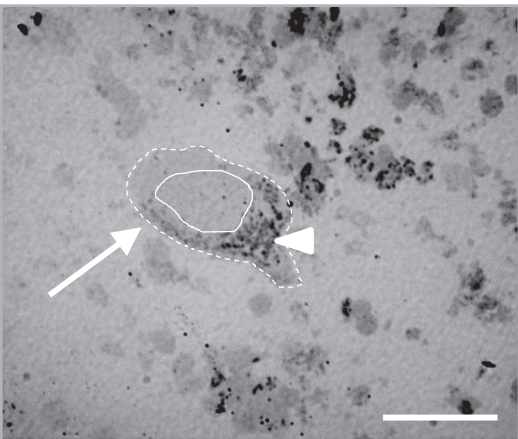**B****NEAT1\_2**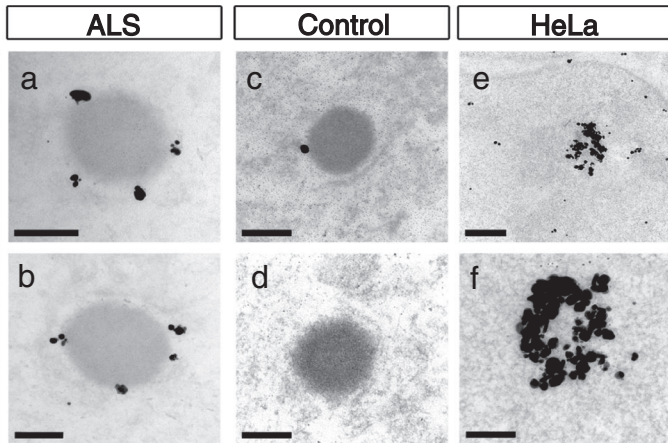

Supplement: MOESM14 [file 25657772]
